# Supplementary material
Source: PubMed Central journal article supplement (PMC3348966)
Supplement: NIHMS353694-supplement-Supp_Fig_S1.pdf [file NIHMS353694-supplement-Supp_Fig_S1.pdf]

## SUPPORTING INFORMATION

### Functional and structural characterization of a thermostable acetyl esterase from *Thermotoga maritima*

Mark Levisson<sup>1\*</sup>, Gye Won Han<sup>2,3\*</sup>, Marc C. Deller<sup>2,3</sup>, Qingping Xu<sup>2,4</sup>, Peter Biely<sup>5</sup>, Sjon Hendriks<sup>1</sup>, Lynn F. Ten Eyck<sup>6,7</sup>, Claus Flensburg<sup>8</sup>, Pietro Roversi<sup>8</sup>, Mitchell D. Miller<sup>2,4</sup>, Daniel McMullan<sup>9</sup>, Frank von Delft<sup>2,3‡</sup>, Andreas Kreusch<sup>10</sup>, Ashley M. Deacon<sup>2,4</sup>, John van der Oost<sup>1</sup>, Scott A. Lesley<sup>2,3,10</sup>, Marc-André Elsliger<sup>2,3</sup>, Servé W. M. Kengen<sup>1†</sup>, Ian A. Wilson<sup>2,3†</sup>

<sup>1</sup>Laboratory of Microbiology, Wageningen University, 6703 HB, Wageningen, The Netherlands

<sup>2</sup>Joint Center for Structural Genomics, <http://www.jcsg.org>

<sup>3</sup>Department of Molecular Biology, The Scripps Research Institute, La Jolla, California 92037

<sup>4</sup>Stanford Synchrotron Radiation Lightsource, SLAC National Accelerator Laboratory, Stanford University, Menlo Park, California 92045

<sup>5</sup>Institute of Chemistry, Slovak Academy of Sciences, 845 38 Bratislava, Slovakia

<sup>6</sup>Department of Chemistry and Biochemistry, University of California at San Diego, La Jolla, California 92093-0505

<sup>7</sup>San Diego Supercomputer Center, University of California at San Diego, La Jolla, California 92093-0505

<sup>8</sup>Global Phasing Ltd. Sheraton House, Castle Park, Cambridge CB3 0AX, United Kingdom

<sup>9</sup>Protein Therapeutics Department, Genomics Institute of the Novartis Research Foundation, San Diego, California 92121

<sup>10</sup>Protein Sciences Department, Genomics Institute of the Novartis Research Foundation, San Diego, California 92121

\*ML and GWH contributed equally to this work.

†Correspondence to:

Ian A. Wilson, Ph.D., Department of Molecular Biology, The Scripps Research Institute, La Jolla, California 92037; (858) 784-2939 Fax: (858) 784-2980; E-mail: [wilson@scripps.edu](mailto:wilson@scripps.edu) or Servé W. M. Kengen, Ph.D., Laboratory of Microbiology, Wageningen University, 6703 HB, Wageningen, The Netherlands; 31 317 483737, Fax: 31 317-483829; E-mail: [serve.kengen@wur.nl](mailto:serve.kengen@wur.nl)

‡Current address: The Structural Genomics Consortium, Roosevelt Drive, Headington, Oxford OX3 7DQ, UK

## Figure S1

Multiple Sequence Alignment of CE7 Members. The alignment consists of 50 amino-acid sequences in the CE7 family, including the TM0077 sequence. The conserved residues are in bold and a consensus is shown underneath the alignment. The serine, aspartate and histidine that constitute the catalytic triad are marked with a square (■). Codes: for most sequences their locus tag is given; sequences without locus tag: Tsp-JW\_ace, acetyl xylan esterase 1 from *Thermoanaerobacterium* sp. 'JW/SL YS485; Gstea\_estA, esterase from *Geobacillus stearothermophilus*; and Bpumi\_ace, acetyl xylan esterase from *Bacillus pumilus*. All sequences can be obtained from CAZy (<http://www.cazy.org/fam/CE7.html>).

```

*      *      *      *      *      *      *      *      *      *      *      *      *      *
TM0077 : -----MAFFDLPL : 8
Tsp-JW_axe : -----MGLFDMPL : 8
BH3326 : -----MPLIDMPL : 8
Csac_2436 : -----MVFDMPPL : 7
ABC1769 : -----MPLVDMPL : 8
Gstea_estA : -----MFDMPPL : 6
LLKF_1447 : -----MTKI : 4
SP_1695 : -----MKNPALL : 7
Spr1538 : -----MKNPALL : 7
SPCG_1668 : -----MKNPALL : 7
SSA_0070 : -----MKNPTLL : 7
SAK_0074 : -----MIETMSL : 7
CPE1596 : -----MALDMSL : 8
DSY0351 : -----MTIIQDAI : 8
Bpumi_axe : -----MQLFDLSL : 8
BPUM_0297 : -----MQLFDLPL : 8
BSU03180 : -----MQLFDLPL : 8
RBAM_00342 : -----MQLYDPL : 8
BLi00379 : -----MQQPYDMPL : 9
Cthe_3063 : -----MAQLYDMPL : 9
TRQ2_0870 : -----MAFFDLPL : 8
Tpet_0847 : -----MAFFDLPL : 8
CTN_0615 : -----MAFFDMPL : 8
TRQ2_0504 : -----MALFDMPL : 8
Tlet_0356 : -----MVYFDMPL : 8
DICTH_1987 : -----MAFFDLPL : 8
RoseRS_079 : -----MAFFDLSF : 8
Rcas_1231 : -----MAFFDLSF : 8
Haur_0886 : -----MHFDMPL : 7
SGR_6428 : -----MPSADLTL : 8
Acel_2045 : -----MPNIDLPL : 8
Krad_3413 : -----MPLTDLPL : 8
Arth_3303 : -----MPLFDLPL : 8
Krad_4187 : -----MALSDLSL : 8
Tfu_1462 : -----MFVECGRGMRPHSDRCGRQTTVVHPASRHSRGAAGDATTPTYAGNRIMVRRGAPPNPHSTPGVPAGVSVRPSTVERTGMVVDLPL : 86
Sare_3004 : -----MTQDMPL : 8
SAV1457 : -----MRGAVPAFDLPP : 12
SCO7057 : -----MAFDLPL : 8
SAML0944 : -----MAFDLPL : 8
SAV1302 : -----MAFDLPL : 8
CMS0795 : -----MMIEATRPTCTRTPPTHPPAHRRTPGGSMLIEPV : 34
CMM_0227 : -----MLIEPV : 6
Mlr6993 : -----MPFPDLIQP- : 9
EF_1236 : ----- : -
BVU_1343 : -----MKNRFLSMLIGAVLFVLSAAAENYPYRSVDLWVTVPDHADWLYKTGEKAKIEVQFYKYGIPODQVEVLYELGGDMMPSDTKGTVKLKNKGKAVI SMGTMKEPGFRDCRLTAKLGGKTYSHHIKVG : 124
BT_2525 : MENRMRRTMIVILNSKMMRRFCVSAALLLTTLLAVAENNPYRSDFVWVTVPDHADWLYKTGEQANVEVQFYKYGIPODQVNIINFEIGGEMMPADTKGTVMIRKKGKATIPVGTMMKPGFRDCRLTTTVDGKKYSHHVKVG : 140
Oter_2302 : ---MMRPTPAFLFVVLALLAGFSPAALAAATPITPVPPGAQLRVAAVQVRVAPDHRDWTYQLGEPVKFKVAVTADNEPIDAVSVSYTIGPDMFPGEKTAAPVLDG-LVIDAGTMQEPGFLRCIVTSEVAGKIYTGATAA : 136
LA_1864 : -----MAISF : 5
Oter_0486 : -----MKRFLGSARLLCATSLALLVLLTASHAAPAVLQPLKASGIYDLGEKAGWTVTMPADATLPTGGYNYTIKKNDTTTLASGPLDPSGGPVEIAVTLNEPAMLFAEVTSAAGEADRAIAGAA : 119
SGR_835 : -----MHRAEIGRGRACDHLVTEQGETLSTHPLTSDGTGLHPLHHTFFP : 44

```

```

TM0077 : EELKKYRP-----ERYEEKRDEDFWEETLAESE--KFPLDPVFERMES-HLKTVEANDVTESGY-----RGQRIRKGLWLLVP-KLE-EEKLECVVQMIICYNG-GRGFPFDWLEFWPSMGICFVMDTRGCGSGWLKGD : 128
Tsp-JW_axe : QKLREYTG-----TNPCPEDEDFYNNRAIDEMR--SVDPKIELI-ESSFQVSAECMDVYETGV-----RGARIRHAKYIKR-K--TEGKHEALIRFHGYSS-NSGDWDDNKINNYAAGCTVVAAMDVRGCGGQSQD-V : 126
BH3326 : TELKEYMG-----RNPKPEDEDFYNDRAIQEMR--KVNPNVELI-PSDFQTTAECCHLYETGV-----RGARIRHAKYIKR-RH--TSGTHEAVIHFHGYTM-NAGEWITGLIHYAALGTVLAMDVRGCGGLES-D : 127
Csac_2436 : DQLKTYMG-----TNPCPEDEDFYQKALREMD--DVDPQVEIVKETSIEAPYAECMNYETGV-----KGARIRSQLIKVRPKK--IEKPCPAVISEHGYAW-YSGDWSDKFALAAAGVVAAMDVRGCGNGYSED-V : 127
ABC1769 : RELLAYEG-----INPKPADDFQYNNRAKTEIE--AIDPEVTLV-ESSFQCSFANCFHYVYRSA--GNAKIRHAKYVQP-K--AGEKTEAVFMFHGYGG-RSAEWSSSLNHYAAGSVFYMDVRGCGGTSSED-P : 126
Gstea_estA : AQLQKYM-----TNPKPADDFWFSRALEELS--AQLSHYELI-PATFQTTVASCHLYETGV-----GGARVHGCVLVKERE--QKQKGEGLVHFHGYHT-NSGDWVDKIAAAGCTVFLAMDVRGCGGKSED-N : 125
LLKF_1447 : NNWQDYQG-----SSLKPEDEDFKDFWEKINLVS--NHQFEFELI-EKNLSSKVNFMHFWPTAI--DGAKIHAQLIVPKN--LKEKYPAIQFHGYHC-DSGDWVDKIGIVAEENVVFLAMDVRGCGGGLSQD-N : 123
SP_1695 : EEIKTYRG-----RDEVEDEDFWDFWGEVKNVS--TL-PSYHLE-ERDFHIFQVKCELTREGS--KEGKVYARIVLPEK--SEEKVELIFHFGYMG-RGWDWADMIGFTVACVGVVSMVDRGCGSGYSQDGL : 125
Spr1538 : EEIKTYRG-----RDEVEDEDFWDFWGEVKNVS--TL-PSYHLE-ERDFHIFQVKCELTREGS--KEGKVYARIVLPEK--SEEKVELIFHFGYMG-RGWDWADMIGFTVACVGVVSMVDRGCGSGYSQDGL : 125
SPCG_1668 : EEIKTYRG-----RDEVEDEDFWDFWGEVKNVS--TL-PSYHLE-ERDFHIFQVKCELTREGS--KEGKVYARIVLPEK--SEEKVELIFHFGYMG-RGWDWADMIGFTVACVGVVSMVDRGCGSGYSQDGL : 125
SSA_0070 : KEMLDYRG-----RDEMDEDEDFWDRQVVEVE--VP-QDYQLL-EKDFQIAYATCELTREKTG--NGGQIYAKLVVPEK--LSEKVEVLFHFGYMG-QGWAWADMAYTAAGVGVVSMVDRGCGSGYSLDGN : 125
SAK_0074 : DDMREYLG-----QDQIEDEDFWKKQTMKYQ--GN-IEYRLD-KKDFNITFAQVADVREKGS--NDSIVYAKCLPEK--TNKPYEVVVFHGYQN-QSPDWSQINHYAAGVGVVSMVDRGCGAGQSQD-K : 124
CPE1596 : EKLIEYRG-----ISPIPEDEDFWDFWSEDELA--NLDIKLELK-KADFESPIAECMDVYENGI--NGARIYAKFMKPKKE--VKRKMALDEBFHGYEE-RSNDWSNNHFMVASCVCVAVMECRGOD-YLKEDS : 127
DSY0351 : QOLETIPY-----RGVDEDEDFEWFLESRRDA--QTKARLELE-AIAYPLKVEVEVSATVLSG--DRTKIKRGYMYRRAIDLQALGLVREHGYSG-NRQQLSELDLWALQCAVFLAMDVRGCGGETPDR : 130
Bpumi_axe : EELKKYRP-----KKTARPDSEDFWKKSLDELR--QVEAEPTE-SDYDYPVKGVKVRITVYQSF-----GHSKIEGWYAVPDQ--TGPHALVHFHGYNASYDGGIHDIVNVALHGATFGMLVDRGCGSEDTS : 127
BPUM_0297 : DDLKKYKP-----KKTARPDSEDFWKKASDEELN--QVEAELALE-PYDYPVKGVKVRITVYQSF--GHSRIEGWYAVPDQ--AGLHPLVHFHGYNASYDGGIHDIVNVALHGATFGMLVDRGCGG-SEDKT : 127
BSU03180 : DQLQTYKP-----EKTAPEDEDFWKLSDLELA--KVQAEPLDQ-PVDYPADGVKVRITVYKSF--GNARIEGWYAVPDQ--EGPHALVHFHGYNASYDGEIHEMVALHGATFGMLVDRGCGS-SEDTS : 127
RBAM_00342 : DQLQTYKP-----NKTAPEDEDFWASSLEELA--KEEAKPELK-AESYPADGVKVRITVYRSF--KGEKVYARIVLPEK--SEEKVELIFHFGYMG-RGWDWADMIGFTVACVGVVSMVDRGCGSGYSDTS : 127
BLi00379 : EQLYQYKP-----ERTAPADDFKPEFWKGSLEELA--NEKAGPQLE-PHEYPADGVKVRITVRSI--GGARIEGWYAVPDR--QGPHEALVHFHGYNASYDGDIDHDIVNVALHGAAFGMLVDRGCGNS-SEDTE : 128
Cthe_3063 : EELKKYKP-----ALTRKQDEDFWEKSDLELA--EIPLYQLI-PYDFPARRVKVRITVYLF--KGANIEGWLAVPEG--EGLYELVHFHGYNWAMDGCVPDVNVALNGAAFTMLVDRGCGQGRSVDNI : 129
TRQ2_0870 : EELKKYRP-----ERYEEKRDEDFWKEETLAESE--GFPLDPVFERMES-HLKTVEANDVTESGY-----RGQRIRKGLWLLVP-KLE-EEKLECVVQMIICYNG-GRGFPFDWLEFWPSMGICFVMDTRGCGSGWLKGD : 128
Tpet_0847 : EELKKYRP-----ERYEEKRDEDFWEGTLEAENE--KFPLDPVFERMES-HLKTVEANDVTESGY-----MGQRIRKGLWLLVP-KLE-EEKLECVVQMIICYNG-GRGFPFDWLEFWPSMGICFVMDTRGCGSGWMMKGD : 128
CTN_0615 : EELKKYRP-----ERYEEKRDEDFWRETLEKSE--GFPLDPVFERMES-HLKTVEANDVTESGY-----RGQRIRKGLWLLVP-KLA-EEKLECVVQMIICYNG-GRGFPFDWLEFWPSMGICFVMDTRGCGSGWMMKGD : 128
TRQ2_0504 : EELRSYLP-----DRYEEEDRDLFWKETLEESR--KFPLDPVFERMES-HLKTVEANDVTESGY-----RGQRIRKGLWLLVP-KLE-EEKLECVVQMIICYNG-GRGFPFDWLEFWPSMGICFVMDTRGCGGTSRVKGD : 129
Tlet_0356 : EDLRKYL-----QRYEEDRDLFWKQTHETR--GYFQEPILKVVDF-YLQNVETEDVTESGY-----RGQRIRKGLWLLVP-KFR-NGKLECVVEFVGYGG-GRGFPPDWLEFWPSMGICFVMDTRGCGSNWMMKGD : 128
DICTH_1987 : SELWKYLP-----EREPDEDEDFWKEETLEESK--KYPLNPIFEKVDF-GLLETVETEDVTESGY-----KGQRIRKGLWLLVP-KNR-SGKLECVVEFVGYGG-GRSFAYDFLWANNMGIHLIMDTRGCGSSWSPNG : 128
RoseRS_079 : DELQRYLP-----PREPEPDDAFWQATLEEAR--MYPLDARFEPYDA-GLLTVETEDVTESGY-----GGQPIKGLWLLL-LP-RHA-SHPLFAVVEFVGYGG-GRGFPTDWLEFWPSMGICFVMDTRGCGSAWLKGD : 128
Rcas_1231 : DELQRYLP-----PREPEPDDAFWQATLEEAR--AYPLDARFEPYDA-GLLTVETEDVTESGY-----GGQPIKGLWLLL-LP-RHR-SGPLECVVEFVGYGG-GRGFPTDWLEFWPSMGICFVMDTRGCGSAWLKGD : 128
Haur_0886 : EQLREYRP-----DRNEPADDFQWQTTADAR--QYPLNANFEPYDM-GLPLVEANDVTESGY-----GGQPIKGLWLLL-LP-RNT-TKPIFCVVEFVGYGG-GRGLAIDWLEFWPSMGICFVMDTRGCGSNWRTGD : 127
SGR_6428 : AECRAYRP-----ELPLPDEGDAFWSDTDERAPGGAPDRRPRFDEVDS--GLVQVRADVSVPGH--DGRPVRGWLRMEAGATG--PLGCVVEFVGYGG-GRGLAHEQIHWACACAHLVMDTRGCGWSSATGD : 131
Acel_2045 : DQLTTYAP-----ALPQPADLQFWSATLAE--APDPEPTFPVDT-GLRCVESDVTFCGY-----GGQPIKGLWLLL-LP-RHA-SHPLFAVVEFVGYGG-GRGLAHEQIHWACACAHLVMDTRGCGSAWLKGD : 128
Krad_3413 : EELRAYRG-----DVAPPADDFWADSLALAR--EHDLAVTLSPHTGALPALRVEDVREAGW--AGDPHAAWLIRPAHLPG--PLEVVEFVGYGG-GRGLPVDRTTWAAGCAHLVMDTRGCG--GD : 124
Arth_3303 : EQLRNYTS-----GVTAPADLDAFWDRTHSEAR--EYPLDAVEFVVDN-YLTVTIDEDVTEAGF--GGSPVKGWLLHLSNRPADEPLVYVQVGYSG-GRGLSNQDTKWAQACAHFIMDNRGCGYGGLLGH : 130
Krad_4187 : EDLEKIDL-----TLHEPAGLDFWARTLSAAD--AHPLDVHREPVT-HLTHRHEDVSEAGY--DGHRIANAWLVLPAGAE--PLEAVVEFVGYGG-GRGLPQDRLEWASACAHLVMDTRGCG-AAWGSG : 127
Tfu_1462 : DRLREYRA-----EREAPADFAEFWEQSLAEAR--THPLGLQVAVDT-PIRLDTYDVFHGY--DGHPIRAWLKTPKDATG--PLEVVEFVGYGN-GRGDVVESEWASACAHLSMDARGCG-AAGSRA : 205
Sare_3004 : DQLRAFRY-----DETEPADDFWAKTLEGEVR--HHELDVVQCPVDT-RLRTVTVDDVRLNGF--GGDRVRAWLVRPAGLAG--PLEAVVEFVGYGG-GRGLPHEKLEWASACAHLVMDTRGCG-GLWS-V : 126
SAV1457 : AELENHRS-----APHEPADDFWQATLEKESG--QAEVPLSVRPFDS-GLRIVETEDVTEAGF--AGDPVRAWVTRPAEAPR--PLEAVVEFVGYGG-GRGLPHERLEWASACAHLVMDTRGCG-DQYGGC : 131
SCO7057 : DELHTYRS-----ASAPEDDEDFWSKTLEEAR--EHDLDARFEPVDT-GLSTVRVYDVTREAGF--GGHPVKAWLTLPAAAAAE--PLEVVEFVGYGG-GRGLPHEKLEWASACAHLVMDTRGCG-SAWGGG : 127
SAML0944 : DELRHCRS-----ESAPEDDEDFWKTLEEAR--EYDLDAFEPYDA-GLSTVRVYDVTREAGF--GGHPVKAWLTLPAAAAAE--PLEVVEFVGYGG-GRGLPHEKLEWASACAHLVMDTRGCG-SAWGGG : 127
SAV1302 : DQLRGYRS-----ASAPEDDEDFWAKTLEEAR--QYDLGPRFEPVET-HLETVVEYDVTREAGF--DGHPIKGLWLLTPARANA--PLEVVEFVGYGG-GRGLPHTLEWASACAHFVMDTRGCG-SAWGGG : 127
CMS0795 : DAARAHVS-----SHVDDEDEDFWADTLEAAA--QHDLVRLAPVQT-DLALVDVQDVTREAGS--GGTDVRAWLRTPRGATG--PLETVVSVVGYGG-GRGRAEETIYAAAGCAHLQMDTRGCG-SYWSAG : 153
CMM_0227 : DAARAHVS-----SHVDDEDEDFWADTLEAAA--RHDLVRLAPVET-DLALVDVQDVTREAGS--GGTDVRAWLRTPRGATG--PLETVVSVVGYGG-GRGRAEETIYAAAGCAHLQMDTRGCG-SYWSAG : 125
Mlr6993 : -ELGAYVS-----SVGMDDEDFWQFWTSTLEEAR--QAGGEVSVQVQAT-TLKAVQSDVTEPGY--LGERIRKGLWLLPETHRKG--RLDVLVQMIICYGG-GRGLAHEQIHWASACAHFVMDTRGCG-SDWSVG : 127
EF_1236 : -----MNEFFEFWQKTKEELO--KIPLDIHRR-VIDYPLENVQVEQDPLSF-----LGERIFGYLLPEK--AGKQHVIVDCLGYMN-HIQEPWQFAHWITQICACFVIDNRGCG-GLTKDR : 106
BVU_1343 : FSPEKLP-----YTQIFSDNEFWNKTKAEAA--RFPLTYTKEYEKYSTDICDYLRLQLN--KQSQCIYGLYLPKAT--EGKYEVVLCPPCAGIKTIKGPMRHKYAEEGCIRFETIETHLNPEDDET : 246
BT_2525 : FSPEKLRP-----YTTPEADDFWENQKAEALA--KFPLTYTKEHVKKYSTDIDCYLKLQVN--QRGQSIYGLYLPKAT--EGKYEVVLCPPCAGIKTIKGPMRHKYAEEGCIRFETIETHLNPESSEE : 262
Oter_2302 : FAPEKIKP-----YQTEPEDEDFWKTLEELA--QAPVEPILTLPLDQCTDKVNVVHVSRTVGPVSMWVPARIVGMLCEPKA--PGKYPAVILKVPACVGRVYPG--DKGLAARGVITLIGIHGIPVNLPEF : 260
LA_1864 : DECFQYTP-----ELHSPSLEEFWSEARDLK--NFPIKKQSKALLKGSIKETLIDSEQSW--ENAILPGLTVIPRK--RGLDVLVYVHHDVYK--DRPGIKGLTETGVAQLLIDTRGHSQILIRL : 123
Oter_0486 : VAPTQLQP-----VVAPPADDFWWTMQLVHL--RIPVEPALKNGES-GRDVEYATVDMNI--DGSHVVQGLAKPAR--EGKFEALLMLQWAGGYPYLPQKPVVYDHAAGLALNLEPHDVPDMPKEF : 239
SGR_835 : DPTHGHDLPRLITVEAPPEDPADFWRRERHARAL--RVDPAPIREGPWT-TVDGVRVADVSTVSV-----DGVRIKGLWLLVPEADG--HVTRGCVSTHGYGG--RAAPDPQAPPCTATIWPCLRGGLG---TRSL : 164

```

fw p gy G rgq

```

TM0077 : TPDYPEGVPDPQYPC-FMTRGILDPRTY YRRVFTDAVRAVEAAASFPRVD---HERIVIAAGSGGGCGLAAVAVSALSCKA-----KALLCDVPFLCHFRFAVQVDVTH-PYAEITNLLKTHR-DKEEI--VFRT : 249
Tsp-JW_ace : GGVGTGNTLNGHIIRG----LDD-DADNMLFRHFVFLTAQLAGIVMMNPEVD---EDRVVVGPSGGGGLAAACAALPEP-----RVRKVSEYVPEFLSDYKQVWDLAKNAQOETIDFRIFLDFPQHRERENEVFTK : 247
BH3326 : GGVKGNTHSGHIIRG----LDD-NADQLFRHFVFLTAQLANIVMNLPEVD---EERVAVTGWSSGGGGLAAACAALPEP-----KIKKAVPVYVPEFLSDYQVWDLAKNAQOETIDFRIFLDFPQHRERENEVFTK : 248
Csac_2436 : GGVKGNTHSGHIIRG----LDG-DKEDLVFRHFVFLTAELAKIIANMPDVD---SSKIAAMGSGGGGGLAAACAALPEP-----YVSRVIVSVYVPEFLCDYKQVWDLAKNAQOETIDFRIFLDFPQHRERENEVFTK : 248
ABC1769 : GGVKGNTHSGHIIRG----LDA-GPDALFYRSVFLDTVQLVRAAKTLPHEVD---KTRIMATGWSGGGGLAAACAALPEP-----EIKRLAPVYVPEFLSDYKQVWDLAVRSYKELADFRSYDPQKRRHGEIFER : 247
Gstea_estA : LQVKGPTLKGHIIRG----IEDPNPHLLYRNVFLDTVQAVRILCSMDHVD---RERTGVVYGASGGGGLAAACAALPEP-----VVKKAVVLYVPEFLSDYKQVWDLAKNAQOETIDFRIFLDFPQHRERENEVFTK : 248
LLKF_1447 : IQTGMGTMKGLIVRC----IDE-GYENLYYRQEMLLITATKILSEFDFVD---ETNLSAOGASGGGGLAAACAALPEP-----LIKKVTATYVPEFLSDYKQVWDLAKNAQOETIDFRIFLDFPQHRERENEVFTK : 244
SP_1695 : RSPLGNTVKGHIIRG----AVE-GRDHLFYKDYVFLDIYQLVEIVASLSQVD---EKRTSSYGASGGGGLAAVAAALNP-----RIQKTVAIYVPEFLSDFRVIETGNTSEAVDELFRFKFHDPPFHETEEMAT : 246
Spr1538 : RSPLGNTVKGHIIRG----AVE-GRDHLFYKDYVFLDIYQLVEIVASLSQVD---EKRTSSYGASGGGGLAAVAAALNP-----RIQKTVAIYVPEFLSDFRVIETGNTSEAVDELFRFKFHDPPFHETEEMAT : 246
SPCG_1668 : RSPLGNTVKGHIIRG----AME-GRDHLFYKDYVFLDIYQLVEIVASLSQVD---EKRTSSYGASGGGGLAAVAAALNP-----RIQKTVAIYVPEFLSDFRVIETGNTSEAVDELFRFKFHDPPFHETEEMAT : 246
SSA_0070 : REVRGNTVKGHIIRG----ALD-GPDQLFEKDYVFLDIYQLVEIVASLSQVD---ENRISSEFGSGGGGGLAAVAAALNS-----RIQKTVAIYVPEFLSDFRVIETGNTSEAVDELFRFKFHDPPFHETEEMAT : 246
SAK_0074 : GHFDGITVKGQIVRC----MIS-GPNHLYKDYVFLDIYQLVEIVASLSQVD---SNQVSYSGWSGGGGLAAVAAALNP-----KIVKTVAIYVPEFLSDFRVIETGNTSEAVDELFRFKFHDPPFHETEEMAT : 245
CPE1596 : CKFKSKSKGHIVRC----LVE-GREKLLFKRNFVFLDTAILARIVMNMPEVD---EERVVAVGSGGGGGLAAACAALPEP-----RIKGVYAYYVPEFLCDYKQVWDLAKNAQOETIDFRIFLDFPQHRERENEVFTK : 248
DSO3180 : VYPSG-AFGSWLTLG----LES--PHTHLYRQVYVFLDGVRAVEALANQPEVD---EKRTGCMCKSGGGGGLAAVAAALNS-----RIQKTVAIYVPEFLSDFRVIETGNTSEAVDELFRFKFHDPPFHETEEMAT : 258
Bpumi_ace : VTPGG-HALGWMTKG----ILS--KDTY YRGVYVFLDAVRAVEVIQSFPEVD---EHRIGVIGSGGGGGLAAVAAALNS-----IPKVVVADYVPEFLSNFQAVDVALEQ-PYLEINSFRFRNS-DPKVEEKAFET : 244
BPUM_0297 : VTPGG-QALGWMTKG----ILS--KETY YRGVYVFLDAVRAVEVIQSFPEVD---EHRIGVIGSGGGGGLAAVAAALNS-----IPKVVVADYVPEFLSNFQAVDVALEQ-PYLEINSFRFRNS-DPKVEEKAFET : 244
BSU03180 : ISPHG-HALGWMTKG----ILD--KDTY YRGVYVFLDAVRAVEVISGFPEVD---ETRTGAVIGSGGGGGLAAVAAALNS-----IPKVVVADYVPEFLSNFQAVDVALEQ-PYLEINSFRFRNS-DPKVEEKAFET : 244
RBAM_00342 : VSPHG-HVPGWMTKG----ILD--KDTY YRGVYVFLDAVRAVEVISGFPEVD---ETRTGAVIGSGGGGGLAAVAAALNS-----IPKVVVADYVPEFLSNFQAVDVALEQ-PYLEINSFRFRNS-DPKVEEKAFET : 244
BLi00379 : ISHHG-HVPGWMTKG----ILD--PKTY YRGVYVFLDAVRAVEVISGFPEVD---EKRTGAVIGSGGGGGLAAVAVSALSCKA-----IPKAAVSEYVPEFLSNFQAVDVALEQ-PYLEINSFRFRNS-DPKVEEKAFET : 245
Cthe_3063 : VPSHG-HALGWMTKG----ILS--PEEY YRGVYVFLDAVRAVEVISGFPEVD---ESRTGAVIGSGGGGGLAAVAVSALSCKA-----IPKAAVSEYVPEFLSNFQAVDVALEQ-PYLEINSFRFRNS-DPKVEEKAFET : 246
TRQ2_0870 : TPDYPEGVPDPQYPC-FMTRGILDPRTY YRRVFTDAVRAVEAAASFPRVD---HERIVIAAGSGGGCGLAAVAVSALSCKA-----KALLCDVPFLCHFRFAVQVDVTH-PYAEITNLLKTHR-DKEEI--VFRT : 249
Tpet_0847 : TPDYPEGVPDPQYPC-FMTRGILDPRTY YRRVFTDAVRAVEAAASFPRVD---HERIVIAAGSGGGCGLAAVAVSALSCKA-----KALLCDVPFLCHFRFAVQVDVTH-PYAEITNLLKTHR-DKEEI--VFRT : 249
CTN_0615 : TPDYPEGVPDPQYPC-FMTRGILDPRTY YRRVFTDAVRAVEAAASFPRVD---SRKVVAVGSGGGGGLAAVAVSALSCKA-----KALLCDVPFLCHFRFAVQVDVTH-PYAEITNLLKTHR-DKEEI--VFRT : 249
TRQ2_0504 : TPDYCEPDPINQYPC-FMTRGILDPRTY YRRVFTDAVRAVEAAASFPRVD---PERIVAVGSGGGGGLAAVAVSALSCKA-----KALLCDVPFLCHFRFAVQVDVTH-PYAEITNLLKTHR-DKEEI--VFRT : 250
Tlet_0356 : TPDYEDNPSDPQYPC-FLTKGVLNPEYTY YRRVFTDAVRAVEAAASFPRVD---SQTILGSGGGGGLAAVAVSALSCKA-----MALLCDVPFLCHFRFAVQVDVTH-PYAEITNLLKTHR-DKEEI--VFRT : 249
DICTH_1987 : TPDYDDEPDPQYPC-FMTRGILDPRTY YRRVFTDAVRAVEAAASFPRVD---RERTGAVIGSGGGGGLAAVAVSALSCKA-----MALLCDVPFLCHFRFAVQVDVTH-PYAEITNLLKTHR-DKEEI--VFRT : 253
RoseRS_079 : TPDPEPEGSNPHHPG-FMTRGITSPTYTY YRRVFTDAVRAVEAAASFPRVD---AGRTAVTIGSGGGGGLAAVAVSALSCKA-----RATMPDVPEFLCHFRFAVQVDVTH-PYAEITNLLKTHR-DKEEI--VFRT : 249
Roas_1231 : TPDPEPEGSNPHHPG-FMTRGIASPTYTY YRRVFTDAVRAVEAAASFPRVD---ARRVAVTIGSGGGGGLAAVAVSALSCKA-----RATMPDVPEFLCHFRFAVQVDVTH-PYAEITNLLKTHR-DKEEI--VFRT : 249
Haur_0886 : TPDTIEGGNPQIYPC-FMTRGILDPGTY YRRVFTDAVRAVEAAASFPRVD---AGKVALAGSGGGGGLAAVAVSALSCKA-----AAVLPDVPEFLCHFRFAVQVDVTH-PYAEITNLLKTHR-DKEEI--VFRT : 248
SGR_6428 : TPDTPDGSAG-SVPC-FLTRGVESPATHY YRRVFTDAVRAVEAAASFPRVD---PARIVVTIGSGGGGGLAAVAVSALSCKA-----GLAGVMPDVPEFLCHFRFAVQVDVTH-PYAEITNLLKTHR-DKEEI--VFRT : 251
Ace1_2045 : TIDAAEAPP--AQPQ-FMTRGILDPRTY YRRVFTDAVRAVEAAASFPRVD---AARVAVTIGSGGGGGLAAVAVSALSCKA-----DVAAMPDVPEFLCHFRFAVQVDVTH-PYAEITNLLKTHR-DKEEI--VFRT : 247
Krad_3413 : TPDPDPTAPGGQWVGFMTKGVNDPSTY YRRVFTDAVRAVEAAASFPRVD---PSEITVALGSGGGGGLAAVAVSALSCKA-----DLAAMPDVPEFLCHFRFAVQVDVTH-PYAEITNLLKTHR-DKEEI--VFRT : 252
Arth_3303 : TADPHPSAGDVAHAG-LMTRGVGSREDYTY YRRVFTDAVRAVEAAASFPRVD---DASRVVAVGSGGGGGLAAVAVSALSCKA-----DVAAMPDVPEFLCHFRFAVQVDVTH-PYAEITNLLKTHR-DKEEI--VFRT : 255
Krad_4187 : GATADPVGYDVSPTG-FMTRGILDPRTY YRRVFTDAVRAVEAAASFPRVD---ADAVCVAGSGGGGGLAAVAVSALSCKA-----DVAAMPDVPEFLCHFRFAVQVDVTH-PYAEITNLLKTHR-DKEEI--VFRT : 248
Tfu_1462 : GATPDPVGSAPSHPC-FMTRGIEDPATY YRRVFTDAVRAVEAAASFPRVD---PERVAVVGSGGGGLAAVAVSALSCKA-----GLAGVSCVPEFLCHFRFAVQVDVTH-PYAEITNLLKTHR-DKEEI--VFRT : 326
Sare_3004 : SDTPDPYGTGSSAPG-FLTRGIVSSPEYTY YRRVFTDAVRAVEAAASFPRVD---ASRVIVTIGSGGGGGLAAVAVSALSCKA-----DIAGVAARSPEFLCHFRFAVQVDVTH-PYAEITNLLKTHR-DKEEI--VFRT : 247
SAV1457 : GDTTPDPHATAPSGPG-PAVRGLLDPRDYTY YRRVFTDAVRAVEAAASFPRVD---GSRVAVVGSGGGGLAAVAVSALSCKA-----DLAAMPDVPEFLCHFRFAVQVDVTH-PYAEITNLLKTHR-DKEEI--VFRT : 252
SCO7057 : GGTADPVGGTPAYPC-FMTRGLDAPENYTY YRRVFTDAVRAVEAAASFPRVD---PSEITVALGSGGGGGLAAVAVSALSCKA-----DLAAMPDVPEFLCHFRFAVQVDVTH-PYAEITNLLKTHR-DKEEI--VFRT : 248
SAML0944 : GGTADPVGGTPAYPC-FMTRGLDAPENYTY YRRVFTDAVRAVEAAASFPRVD---PSEITVALGSGGGGGLAAVAVSALSCKA-----DLAAMPDVPEFLCHFRFAVQVDVTH-PYAEITNLLKTHR-DKEEI--VFRT : 248
SAV1302 : D-TPDPVGSAPSHPC-FMTRGVEDPESYTY YRRVFTDAVRAVEAAASFPRVD---SARVAVVGSGGGGLAAVAVSALSCKA-----DLAAMPDVPEFLCHFRFAVQVDVTH-PYAEITNLLKTHR-DKEEI--VFRT : 247
CMS0795 : D-TADHGEAGPALPC-FMTRGIASRETYTY YRRVFTDAVRAVEAAASFPRVD---PARIVAVGSGGGGGLAAVAVSALSCKA-----DLAAMPDVPEFLCHFRFAVQVDVTH-PYAEITNLLKTHR-DKEEI--VFRT : 273
CMM_0227 : D-TADHGEAGPALPC-FMTRGIASRDYTY YRRVFTDAVRAVEAAASFPRVD---PARIVAVGSGGGGGLAAVAVSALSCKA-----DLAAMPDVPEFLCHFRFAVQVDVTH-PYAEITNLLKTHR-DKEEI--VFRT : 245
Mlr6993 : E-TADPVGSTSSIPG-FMTRGVLDKNDYTY YRRVFTDAVRAVEAAASFPRVD---PERTAVGSGGGGGLAAVAVSALSCKA-----RVKAVMPDVPEFLCHFRFAVQVDVTH-PYAEITNLLKTHR-DKEEI--VFRT : 247
EF_1236 : VPYQTIWHEAPMGRG----FLDKEDWQRRLDPAHLRSVEVVRTFTETIN---QDQILIRGSGGGGGLAAVAVSALSCKA-----ILATFADVSHSCLENRVAEGTGS--YQTIHQIQEHP--QAHEKIAAV : 222
BVU_1343 : FGEISRAFSSRENGY--LVNGLDSRENYTY YRRVFTDAVRAVEAAASFPRVD---GKNVIVGSGGGGGLAAVAVSALSCKA-----VTACVANHPALSDMAGYKAGRAGG--YPHFFKNTVD---MDTPAKMKT : 363
BT_2525 : FKEISAAFNGRENGY--LSNGLDSRDNYTY YRRVFTDAVRAVEAAASFPRVD---GKNVIVGSGGGGGLAAVAVSALSCKA-----VTACVANHPALSDMAGYKAGRAGG--YPHFFKNTVD---MDTPAKMKT : 379
Oter_2302 : YDVL--YAGALTGY--WTFNSDNRETYTY YRRVFTDAVRAVEAAASFPRVD---GKNVIVGSGGGGGLAAVAVSALSCKA-----VSGLAVTHAGCDWAAPLHGRAGG--WPHFFMPEGADKPSANATPARMAA : 379
LA_1864 : LKEGELPDPDWTYPGY--FTKGLDGKDSF--MGLYLLVIRAVEFLRLTDCID---GDKTILGAKSGGASAAFGAAFTN-----RIKGLILETDFNCHIDNQLKLDKS--WMEIDTQLNSFK--TKKTAMKKS : 243
Oter_0486 : YDALPAMIKSYNTIY-----NDSRDRN--FLRMLGAYRAVDYLAGRPDWD---GRTLVLTGTSMGQQS--AVAGLHP-----QITHVIVHVEGADANAAALHGRSEG-----YPNWDR---TNPKMVET : 347
SGR_835 : LPGVAPRSAGHVLRG----TEARESYVIGGCVA--VWCAATALSSLPVET---SGRTYLTGTSMGCG--GALALPWDDR-----FRAAGLTVTFGNHPLRVTPCTG-SGESVRLAEDP-----SVLDV : 276

```

G SgGg P

```

TM0077 : LSVFDGVNFAARA--KIPALFSVGLMDNICPPSTVFAAANNHYAGP-----KEIRIYPYNNHEG-----GGSFQAVEQVKFLKLLFEKG----- : 325
Tsp-JW_axe : LGMIDVKNLAKRI--KGDVLMCVGLMDQVCPPTVFAANNIQQSK-----KDQKVYPDYCHEP-----MRG-FGDLAMQFMLELYS----- : 320
BH3326 : LGMIDVQHLAPLV--KGEVLLAVGLMDTVCPPTVFAANNKILTTT-----KSEIYPDFFAHED-----LPG-HRDRIQFQLSDL----- : 319
Csac_2436 : LGMIDVQHLAKWI--KAEVLMVGTGLMDTICPPSTVFAANNKIQSK-----KQMLIYPDFGHEQ-----IFY-LNDRIFMYLMEMLE----- : 321
ABC1769 : LGMIDVQHLADRI--QGDVLMGVGLMDTECPPSTVFAANNKIKAK-----KSYELYPDFGHEH-----LPG-MNDHIFRFFTS----- : 317
Gstea_estA : LGMIDVQHLADRI--CADVLWAVGLMDHICPPSTVFAANNKIKSK-----KDQVIFYEYCHEY-----LPT-MGDRAVLFQCFIIFPIQKRNVK----- : 329
LLKF_1447 : LEMIDIQNLAPRI--KAEVILWLGKQDVTVPPTVFAANNKIQSK-----KSEIYVLPYCHEY-----LPK-ISDWLRENQ----- : 312
SP_1695 : LAMIDVKNLAHRI--QGEVKMITGLDDVVCYPTITVFAANNRLTCD-----KTYRIMPEYAHEA-----MNVFVNDQVYNWLCGSEIP-----FKYLYK----- : 326
Spr1538 : LAMIDVKNLAHRI--QGEVKMITGLDDVVCYPTITVFAANNRLTCD-----KTYRIMPEYAHEA-----MNVFVNDQVYNWLCGSEIP-----FKYLYK----- : 326
SPCG_1668 : LAMIDVKNLAHRI--QGEVKMITGLDDVVCYPTITVFAANNRLTCD-----KTYRIMPEYAHEA-----MNVFVNDQVYNWLCGSEIP-----FKYLYK----- : 326
SSA_0070 : LAMIDVKNLAHRI--SCPVQMIIGEDDVCYPTITVFAANNRLAGE-----KEYHLLPEYCHEA-----MNVVSDTVFNWLCGTKIKRSLISDFKSER----- : 333
SAK_0074 : LAMIDVKNFAHRI--SCPVLLTALRDDICPPSTVFAANNRLTST-----KKHLLDPDYCHDP-----MTVQVKDYIFDQLTGSQFT-----KQKIE----- : 325
CPE1596 : LGMIDIKNMAHRI--KGVNMAIGRDDICPPSIVFAANNILCE-----K-ELVLYDGGQKP-----YLLNLKDKIYKWAINL----- : 319
DSY0351 : LDMFDGVHFAAPWLGKKTACLVSMLGKDTVCPPTVFWLWKGICGE-----KKLTIYPEYCHES-----PDGFDVDRQIEFFAKELL----- : 333
Bpumi_axe : LSVFDLNLGAGWV--KQPTLMAIGLIDKTPPSTVFAANNHLETD-----KDQKVYRYFCHHEF-----IPAFQTEKLSFLQKHLLLST----- : 320
BPUM_0297 : LSVFDLNLGAGWV--NQPTLMAIGLIDKTPPSTVFAANNHLETD-----KDQKVYRYFCHHEY-----ISAFQTEKLAFLQKHLTN----- : 318
BSU03180 : LSVFDIMNLADRV--KVPVLMISIGLIDKTPPSTVFAANNHLETK-----KEIKVYRYFCHHEY-----IPAFQTEKLAFFKQHLKG----- : 318
RBAM_00342 : LAMFDIMNLADRV--KVPVLMISIGLIDRTPPSTVFAANNHLETK-----KEIKVYRYFCHHEY-----IPSFHTEKLAFLKHLKG----- : 318
BLi00379 : LSVFDMNLAQLV--KATVLMISIGLIDTTPPSTVFAANNHLETD-----KEIKVYRYFCHHEY-----IPPFQTEKLAFLRKHKL----- : 318
Cthe_3063 : LSVFDIMNLAPRI--KCRTWICTGLVDETPPSTVFAANNHLKCP-----KEISVFRYFCHHEH-----MPGSVEIKLRIIMDELNP----- : 320
TRQ2_0870 : LSVFDGVNFAARA--KIPALFSVGLMDNICPPSTVFAANNHYAGP-----KEIRIYPYNNHEG-----GGSFQAVEQVKFLKRLFEKG----- : 325
Tpet_0847 : LSVFDGVNFAARA--KIPALFSVGLMDNICPPSTVFAANNHYAGP-----KEIRIYPYNNHEG-----GGSFQAVEQVKFLKRLFEKG----- : 325
CTN_0615 : LSVFDGVNFAARA--KVPALFSVGLMDTICPPSTVFAANNHYAGP-----KEIRIYPYNNHEG-----GGSFQAVEQVKFLKRLFEKG----- : 325
TRQ2_0504 : LSVFDGVNFAARA--KIPALFSVGLMDKICPPSTVFAANNHYAGP-----KEIKVYPFNHEG-----GESFORMELRFRMKRILKGEFKA----- : 329
Tlet_0356 : LSVFDGVNFAARA--KCPALFSVGLMDDICPPSTVFAANNHYAGE-----KDRIYYPYNNHEG-----GGSFHTLEKLFVKKTISMRE----- : 326
DICTH_1987 : LSVFDGVNFAARA--KAKALFSVGLMDNICPPSTVFAANNHYGGE-----KEIKVYPFNHEG-----GGTFHTYKMKFAKRNLDK----- : 328
RoseRS_079 : LSVFDGVNFAARA--QAPALFSVGLMDDVCPPTVFAANNHYDGP-----KQIRVYRYNHEG-----GGTFQNOEKIRFLRVLVGG----- : 324
Rcas_1231 : LSVFDGINFAARA--QAPALFSVGLMDDVCPPTVFAANNHYAGR-----KEIRVYRYNHEG-----GGTFQNOEKIRFLREAVEV----- : 324
Haur_0886 : LDMFDGMQFAARA--TCPTLFSVGLMDDVCPPTVFAANNHYAGP-----KEITVWQFNHEG-----GENFQTEKLFKFLTKLWNEERTA----- : 328
SGR_6428 : LSVFDGAHFAARA--TAPALFSVGLMDDICPPSTVFAANNHYAGP-----KDQVYEFNHEG-----GAEHHRAEQLAWVRALFAGLPADRTDRA----- : 335
Acel_2045 : LAMFDGAVLAFRA--TAPALFSVGLMDDICPPSTVFAANNHYAGP-----KEIVVYPFNHEG-----GGPFQAGRQLRWLAAVLEK----- : 322
Krad_3413 : LSVFDGANFAARA--AAPALFSVGLMDDVCPPTVFAANNHYAGER-----AGSPRQDQVWDFGDEG-----GLGFQVQRQLRFLDGLGLR----- : 332
Arth_3303 : LNMFDGVNLGRAA--TAPALFSAAQADDICPPSTVFAANNHYAGP-----KEIVYRFNHEG-----QGEHQWNRQLEYLRKMLG----- : 343
Krad_4187 : LDMFDVAHLVPRRA--TAPALISLALMDRVCPPSTVFAANNHYAGP-----AEISVHPFNHEG-----GQTHQWRRQLEWLSALLTAPGASA----- : 328
Tfu_1462 : LSVFDGVHFAARA--TAPALLTVGLMDDVCPPTVFAANNHYAGPK-----DQVWVWYNAHEG-----GGVEDLRASMAFLAPLLDGRPVAAHNTVTIHDQAATG----- : 419
Sare_3004 : LGMFDGVFMARRA--RRPGWFSAGLMDVCPSSVFAAANFAGPV-----HVEVWYNYCHEG-----GGVDDRLLLDWGANLVAGP-----DE----- : 325
SAV1457 : LSVVEGVSEARRA--TAPAHFGIGLMDTVCPSSGAAANNRYAELTG-----HDPLKEIHPYFNDHEG-----GDAVHVRQLTFLDGLLGG----- : 333
SCO7057 : LSVFDGVHFAARG--RAPALFSAAQEDQICPPSTVFAANNWATHED-----KTEVYDFNHEG-----GGPYQEAALRWLRSRHA----- : 322
SAML0944 : LSVFDGVHFAARG--RAPALFSAAQEDQICPPSTVFAANNWAHED-----KAEVYDFNHEG-----GGPFQEAALRWLRSYV----- : 322
SAV1302 : LSVFDGVHFAARG--SAPALFSAAQEDQICPPSTVFAANNWAHAD-----KAEVYDFNHEG-----GGPYQEAALRWLPDRLR----- : 322
CMS0795 : LRHFDGVAFSRRRA--TAPARFSVGLMDATCPPSTVFAANNWYAGE-----KEIWEVYNGHDG-----GGIDDELGTLAFLKRRMG----- : 347
CMM_0227 : LRHFDGVAFSRRRA--TAPARFSVGLMDATCPPSTVFAANNWYAGE-----KEIWEVYNGHDG-----GGIDDELGTLAFLWRRMG----- : 319
Mlr6993 : LNMFDGVNFAARRS--KAPALFSVGLMDEVCPPSTVFAANNWYAGE-----KTEIYEFNHEG-----GGYQERQMTWLSRLFGVG----- : 323
EF_1236 : LPMFDSRHFVSOI--KNPVFASVGSHPICPMKDFSPSHQIKAR-----KAVRVYWKKGHGG-----GETTOIRREMRSIQQLLQEVKNENSYV----- : 305
BVU_1343 : LAMFDVNVFAKQI--TVPVMTWGFNDQICPPSTVFAANNWLNCP-----KEALITPVNHEWT-----SETTEYGHLWLWIKKHLK----- : 436
BT_2525 : LAMFDVNVFAQLI--RADTYMTWGFNDQICPPSTVFAANNWLNCP-----KEALITPVNHEWT-----SSDTEYGHLWLWIKKHLK----- : 452
Oter_2302 : LAMFDVAVNFAKRI--KVPGYNNGWYNDVTPPSTVFAANNWITAP-----KTEGLTLEMCHOY-----NEEQWKAIDNWWVTOAIGVK----- : 454
LA_1864 : LAMFDVSNFSKKI--KVPFLVSVGLMDRSHKSIKFAFNHLNCD-----KRQVYPTENBAG-----FKDEKQNGANLEFVREIFFPE----- : 321
Oter_0486 : ARVFDVNVFAPHI--KARSLVSLGFLDRVCPAGITAFANLTAGP-----KEVPLVEAANHQSTPEQQRAYDRSKAWMDALVKGQEP----- : 430
SGR_835 : LAMFDVAAFAARHL--RIPVHVGAALDDPSVPEPQGFVAVNLAGP-----RELVVLRAGHDFHP-----GERAETAALAEAAQROFLSIRT----- : 354

```

D cpp he
